# Supplementary material for: Benefit and risk associated with interleukin-6 receptor inhibitor administration during severe COVID-19: a retrospective multicentric study none
Source: Research Square preprint supplement (doi:10.21203/rs.3.rs-6785789/v1), 2025-06-17
Supplement: Supplementary file 1 [file 7409d411ff2bc41f10fe5393.docx]

**Settings and participants**

Five medical departments (three internal medicine and two pulmonology departments) and four intensive care units (ICUs) across three regional university centers participated in the study. The cohort comprised all consecutive adult patients (aged ≥ 18) admitted with a respiratory form of COVID-19, requiring at least nasal oxygen to maintain a pulsed oxygen saturation above 94%. **COVID-19 was confirmed by a positive SARS-CoV-2 real-time reverse transcriptase-polymerase chain reaction (RT-PCR) assay from nasal or oropharyngeal swabs, or lower respiratory tract samples (in invasively ventilated patients).** Patients without laboratory-confirmed COVID-19 were excluded from the study. **Variant determination through systematic sequencing was not available during the study period.**

Patients were categorized into two groups: the "ward group," which included patients who spent their entire hospital stay in a ward, and the "ICU group," which included patients who required ICU admission at any point during their hospital stay. **The percentage of lung lesions identified by CT scan was not recorded due to the heterogeneity in CT scan availability and the variable time delay between hospital admission and imaging during the pandemic**.

Patients were admitted to the ICU if they required noninvasive or invasive mechanical ventilation or if they experienced any other acute organ failure. Hypoxemic patients who only required supplemental oxygen were admitted to medical wards. Patients who required high-flow nasal oxygen were admitted either to a medical ward or to the ICU, depending on bed availability and the clinical assessment of severity.

**Definition of nosocomial infections**

Nosocomial pneumonia was defined as the association of a new alteration in hematosis, qualitative and quantitive modification of bronchorrhea, worsening of systemic inflammatory response and new opacity on chest-X-ray or CT-scan

**Data collection and proceeding**

Data were collected using a standardized electronic form from the day of admission until hospital discharge. Major adverse event included nosocomial infections, myelotoxicity and digestive tract hemorrhage. Hospital acquired and ventilator-associated pneumonia were defined according to the European (20,21) and American guidelines (22). Other ICU-acquired infections were diagnosed by the attending physician following established guidelines (23). Urinary tract infection was defined by worsening of systemic inflammatory response, urinary symptoms (burning feeling when urinating, strong urge, pelvic pain…) and bacteriuria. Primary bacterial bloodstream infection and central line associated bloodstream infection were defined as in the EUROBACT study (24). Bacteremic infection were defined as visceral infection associated with bacteremia involving the same pathogen. Hospital-acquired infections were defined as any infectious episode that occurred at least 48h after hospital admission (or after the usual incubation length of the considered pathogen).

Upper digestive tract hemorrhage was suspected with acute anemia, worsening of previous anemia, hematemesis, melena or hematochezia and confirmed by endoscopic demonstration of an esophageal, gastric or duodenal lesion (25–27). Lower intestinal hemorrhage was defined by the presence of melena or hematochezia and confirmed by colonoscopy (27). Thrombopenia was defined as a platelet count below 150 G/l; neutropenia was defined as a neutrophils count below 1 500 /mm3, with severe neutropenia below 500 /mm3. The etiology of neutropenia and thrombopenia diagnosed by the attending physician were retained as final cause. Each infectious episode was evaluated by an adjudication committee (CL, TFB, AP), blinded to the use of IL-6R inhibitor. Disagreements were resolved through discussion with an additional evaluator (FP). Infections could be considered present even with negative microbiological samples (e.g., abscesses or pneumonia). Adequate antibiotic therapy was defined as the administration of at least one effective antimicrobial agent against identified or suspected pathogens.

The primary outcome was the proportion of hospital-acquired infectious episodes during the hospital stay. Secondary outcomes included the occurrence of leukopenia, thrombocytopenia, digestive hemorrhage or perforation, as well as the length of stay in the intensive care unit (ICU) and hospital, and the duration of mechanical ventilation. The exposure variable was the administration of tocilizumab or sarilumab during the hospital stay.

Collected data: Demographic parameters (age, sex, body mass index (BMI), smoking habits and alcohol consumption), clinical outcomes (length of ICU and hospital stay, hospital mortality, comorbidities (hypertension, diabetes mellitus, chronic heart failure, chronic respiratory failure, ischemic heart disease, alcohol and tobacco consumption, chronic kidney disease, dialysis, cancer or malignant hemopathy, stroke, gastric or duodenal ulcer) and Charlson comordibity score (28)); usual treatments (immunosuppressive therapy, anticoagulant therapy, antiaggregant treatment); laboratory data (nadir leucocytes and platelet count during the hospital stay; microbial culture results (*i.e*. bacterial or fungal cultures, specific PCR and film arrays, *Legionella pneumophila* and *Streptococcus pneumonia* antigenuria - results of specific samplings); infectious episodes (number and type of infections during the stay, including hospital-acquired pneumonia, ventilator-associated pneumonia, urinary tract infection, primary and secondary bacteremia, visceral abscess, catheter-related infection, and skin infection); gastrointestinal Complications: Digestive hemorrhage, digestive perforation, preventive use of proton pump inhibitors; hematological Abnormalities: Thrombocytopenia, neutropenia, severe neutropenia. For ICU patients, were added simplified acute physiology II (SAPS II) score (29), use of high flow nasal oxygen, non-invasive ventilation, invasive mechanical ventilation, length of ventilation, prone position requirement, use of neuromuscular blockers; catecholamine; dialysis; extracorporeal membrane oxygenation, occurrence of cardiac arrest. Regarding specific COVID-19 therapeutic interventions, data on the use of corticosteroids, chloroquine or hydroxychloroquine, anakinra, lopinavir/ritonavir, curative anticoagulants, tocilizumab, or sarilumab were collected. All the data were extracted from electronic medical records.

**Statistical analysis**

Patient characteristics were described for the entire population and stratified by the use of IL-6 inhibitors (tocilizumab or sarilumab). Categorical variables are presented as counts (percentages), and continuous variables as mean (± standard deviation) or median with interquartile range [Q1; Q3], depending on their distribution. Categorical variables were compared between groups using the Pearson Chi-squared test or Fisher’s exact test, while continuous variables were compared using the Student’s t-test or the Wilcoxon rank-sum test. As there were no formal recommendations for the use of tocilizumab or sarilumab, their prescription was based on patient-specific characteristics and the judgment of the attending physician. To address potential bias introduced by these prescription methods, a logistic regression model was employed to examine the relationship between the use of these medications and hospital-acquired infectious episodes. Details are provided in the supplementary material.

The adjustment factors included in the model were sex, age, body mass index (BMI), tobacco consumption, hypertension, ischemic heart disease, heart failure, diabetes mellitus, drug-induced immunosuppression, infection-induced immunosuppression, gastroduodenal ulcer, chronic obstructive pulmonary disease (COPD) or asthma, long-term oxygen therapy, dialysis, cancer, stroke, treatment with proton pump inhibitors, anticoagulation therapy, antiplatelet therapy, initial admission to the intensive care unit (ICU), and center of admission. Variables with a p-value ≤ 0.20 in univariate analysis were retained in the multivariate model. Multicollinearity was assessed using a correlation matrix, tolerance, and variance inflation factors. Due to the violation of linearity when using age as a continuous variable, it was categorized using quartile values. direct multivariate binary logistic regression model was constructed, incorporating the aforementioned adjustment factors. Results are presented as odds ratios (ORs) with two-sided 95% confidence intervals (CIs). To address the risk of bias due to missing data, analyses were first conducted among complete cases for the variables included in the model. Subsequently, multiple imputations were performed using the Fully Conditional Specification method. Discriminative and logistic functions were used for categorical and binary variables, respectively, and 15 datasets were created. All statistical analyses were performed using R Statistical Software version 4.2.2 (R Core Team, R Foundation for Statistical Computing, Vienna, Austria).

**Supplementary tables**

Supplementary table 1: Participants: ward population: Tocilizumab versus absence of Tocilizumab

|  | Total (N=1603) | No Tocilizumab (N=1523) | Tocilizumab (N=80) | OR [IC95%] | p |
| --- | --- | --- | --- | --- | --- |
| **Center of inclusion (N=2573)** |  |  |  |  |  |
| Center 1 | 927 (58.16%) | 899 (59.34%) | 28 (35.44%) | 1.00 | <0.0001 |
| Center 2 | 666 (41.78%) | 615 (40.59%) | 51 (64.56%) | 2.66 [1.66;4.27] |  |
| Center 3 | 1 (0.06%) | 1 (0.07%) | 0 (0.00%) | - |  |
| **Age (years) (N=1601)** |  |  |  |  |  |
| Mean (SD) | 64.99 (16.81) | 64.72 (16.84) | 70.11 (15.35) |  | 0.0034 |
| **Sex (N=1599)** |  |  |  |  |  |
| Female | 657 (41.09%) | 625 (41.12%) | 32 (40.51%) | 1.00 | 0.91 |
| Male | 942 (58.91%) | 895 (58.88%) | 47 (59.49%) | 1.03 [0.65;1.63] |  |
| **BMI (kg/m2) (N=1212)** |  |  |  |  |  |
| Median [Q1;Q3] | 27.10 [23.83;31.00] | 27.06 [23.77;30.86] | 27.73 [25.26;32.00] |  | 0.23 |
| **BMI (kg/m2) (N=1212)** |  |  |  |  |  |
| <=25 | 413 (34.08%) | 397 (34.73%) | 16 (23.19%) | 1.00 | 0.09 |
| ]25 - 30] | 432 (35.64%) | 400 (35.00%) | 32 (46.38%) | 1.99 [1.07;3.68] |  |
| >30 | 367 (30.28%) | 346 (30.27%) | 21 (30.43%) | 1.51 [0.77;2.93] |  |
| **Smoking habits (N=1595)** |  |  |  |  |  |
| ND | 144 (9.03%) | 137 (9.04%) | 7 (8.86%) | 1.00 | 0.24 |
| No | 1180 (73.98%) | 1116 (73.61%) | 64 (81.01%) | 1.12 [0.50;2.50] |  |
| Yes | 271 (16.99%) | 263 (17.35%) | 8 (10.13%) | 0.60 [0.21;1.68] |  |
| **Alcohol habits (N=1592)** |  |  |  |  |  |
| ND | 198 (12.44%) | 191 (12.63%) | 7 (8.75%) | 1.00 | 0.50 |
| No | 1273 (79.96%) | 1205 (79.70%) | 68 (85.00%) | 1.54 [0.70;3.40] |  |
| Yes | 121 (7.60%) | 116 (7.67%) | 5 (6.25%) | 1.18 [0.36;3.79] |  |
| **Hypertension (N=1602)** |  |  |  |  |  |
| No | 862 (53.81%) | 828 (54.40%) | 34 (42.50%) | 1.00 | 0.0374 |
| Yes | 740 (46.19%) | 694 (45.60%) | 46 (57.50%) | 1.61 [1.02;2.54] |  |
| **Ischemic cardiopathy (N=1601)** |  |  |  |  |  |
| No | 1427 (89.13%) | 1360 (89.36%) | 67 (84.81%) | 1.00 | 0.21 |
| Yes | 174 (10.87%) | 162 (10.64%) | 12 (15.19%) | 1.50 [0.80;2.84] |  |
| **Chronic heart failure (N=1601)** |  |  |  |  |  |
| No | 1531 (95.57%) | 1457 (95.73%) | 74 (92.50%) | 1.00 | 0.16 |
| Yes | 71 (4.43%) | 65 (4.27%) | 6 (7.50%) | 1.82 [0.76;4.33] |  |
| **Diabetes mellitus (N=1601)** |  |  |  |  |  |
| No | 1246 (77.83%) | 1191 (78.30%) | 55 (68.75%) | 1.00 | 0.0450 |
| Yes | 355 (22.17%) | 330 (21.70%) | 25 (31.25%) | 1.64 [1.01;2.67] |  |
| **Immunosuppressive treatment (N=1602)** |  |  |  |  |  |
| No | 1518 (94.76%) | 1439 (94.55%) | 79 (98.75%) | 1.00 | 0.12 |
| Yes | 84 (5.24%) | 83 (5.45%) | 1 (1.25%) | 0.22 [0.03;1.60] |  |
| **Infectious mmunodepression (N=1602)** |  |  |  |  |  |
| No | 1580 (98.63%) | 1500 (98.55%) | 80 (100.00%) | 1.00 | 0.62 |
| Yes | 22 (1.37%) | 22 (1.45%) | 0 (0.00%) | - |  |
| **Gastric or duodenal peptic ucler (N=1602)** |  |  |  |  |  |
| No | 1563 (97.57%) | 1485 (97.57%) | 78 (97.50%) | 1.00 | >0.99 |
| Yes | 39 (2.43%) | 37 (2.43%) | 2 (2.50%) | 1.03 [0.24;4.35] |  |
| **COPD/SAS/Asthma (N=1602)** |  |  |  |  |  |
| No | 1301 (81.21%) | 1242 (81.60%) | 59 (73.75%) | 1.00 | 0.08 |
| Yes | 301 (18.79%) | 280 (18.40%) | 21 (26.25%) | 1.58 [0.94;2.64] |  |
| **Long-term oxygen therapy (N=1601)** |  |  |  |  |  |
| No | 1589 (99.25%) | 1509 (99.21%) | 80 (100.00%) | 1.00 | >0.99 |
| Yes | 12 (0.75%) | 12 (0.79%) | 0 (0.00%) | - |  |
| **Chronic renal failure (N=1602)** |  |  |  |  |  |
| No | 1478 (92.26%) | 1407 (92.44%) | 71 (88.75%) | 1.00 | 0.23 |
| Yes | 124 (7.74%) | 115 (7.56%) | 9 (11.25%) | 1.55 [0.76;3.18] |  |
| **Chronic diialysis (N=1602)** |  |  |  |  |  |
| No | 1587 (99.06%) | 1507 (99.01%) | 80 (100.00%) | 1.00 | >0.99 |
| Yes | 15 (0.94%) | 15 (0.99%) | 0 (0.00%) | - |  |
| **Malignant hemopathy / Cancer (N=1600)** |  |  |  |  |  |
| No | 1388 (86.75%) | 1319 (86.78%) | 69 (86.25%) | 1.00 | 0.89 |
| Yes | 212 (13.25%) | 201 (13.22%) | 11 (13.75%) | 1.05 [0.54;2.01] |  |
| **Stroke (N=1602)** |  |  |  |  |  |
| No | 1478 (92.26%) | 1404 (92.25%) | 74 (92.50%) | 1.00 | 0.93 |
| Yes | 124 (7.74%) | 118 (7.75%) | 6 (7.50%) | 0.96 [0.41;2.26] |  |
| **Proton pump inhibitor (N=1588)** |  |  |  |  |  |
| Non | 1249 (78.65%) | 1190 (78.86%) | 59 (74.68%) | 1.00 | 0.38 |
| Oui | 339 (21.35%) | 319 (21.14%) | 20 (25.32%) | 1.26 [0.75;2.13] |  |
| **Anticoagulation (N=15845)** |  |  |  |  |  |
| Non | 1386 (87.50%) | 1318 (87.57%) | 68 (86.08%) | 1.00 | 0.69 |
| Oui | 198 (12.50%) | 187 (12.43%) | 11 (13.92%) | 1.14 [0.59;2.20] |  |
| **Antiaggregant treatment (N=1585)** |  |  |  |  |  |
| Non | 1260 (79.50%) | 1199 (79.67%) | 61 (76.25%) | 1.00 | 0.46 |
| Oui | 325 (20.50%) | 306 (20.33%) | 19 (23.75%) | 1.22 [0.72;2.07] |  |

BMI : Body mass index; COPD: chronic obstructive pulmonary diseases; SAS: sleep apnoea syndrome

Supplementary table 2: ICU requirement (“ICU group”): Tocilizumab versus absence of Tocilizumab

|  | Total (N=984) | No Tocilizumab (N=872) | Tocilizumab (N=112) | OR [IC95%] | p |
| --- | --- | --- | --- | --- | --- |
| **Center of inclusion (N=979)** |  |  |  |  |  |
| Center 1 | 434 (44.33%) | 376 (43.37%) | 58 (51.79%) | 1.00 | <0.0001 |
| Center 2 | 289 (29.52%) | 242 (27.91%) | 47 (41.96%) | 1.26 [0.83;1.91] |  |
| Center 3 | 256 (26.15%) | 249 (28.72%) | 7 (6.25%) | 0.18 [0.08;0.41] |  |
| **Age (years)** |  |  |  |  |  |
| Mean (SD) | 61.33 (13.15) | 61.35 (13.15) | 61.18 (13.14) |  | 0.86 |
| **Sex (N=983)** |  |  |  |  |  |
| Female | 306 (31.13%) | 261 (29.97%) | 45 (40.18%) | 1.00 | 0.0280 |
| Male | 677 (68.87%) | 610 (70.03%) | 67 (59.82%) | 0.64 [0.43;0.95] |  |
| **BMI (kg/m2) (N=937)** |  |  |  |  |  |
| Median [Q1;Q3] | 28.28 [24.98;32.28] | 28.08 [24.91;31.85] | 29.80 [25.37;34.65] |  | 0.0179 |
| **BMI (kg/m2) (N=937)** |  |  |  |  |  |
| <=25 | 240 (25.61%) | 216 (26.18%) | 24 (21.43%) | 1.00 | 0.12 |
| ]25 - 30] | 336 (35.86%) | 301 (36.48%) | 35 (31.25%) | 1.05 [0.60;1.81] |  |
| >30 | 361 (38.53%) | 308 (37.33%) | 53 (47.32%) | 1.55 [0.93;2.59] |  |
| **Smoking habits** |  |  |  |  |  |
| ND | 99 (10.06%) | 95 (10.89%) | 4 (3.57%) | 1.00 | 0.0064 |
| No | 697 (70.83%) | 604 (69.27%) | 93 (83.04%) | 3.66 [1.31;10.18] |  |
| Yes | 188 (19.11%) | 173 (19.84%) | 15 (13.39%) | 2.06 [0.66;6.38] |  |
| **Alcohol habits (N=983)** |  |  |  |  |  |
| ND | 130 (13.22%) | 125 (14.35%) | 5 (4.46%) | 1.00 | 0.0075 |
| No | 791 (80.47%) | 689 (79.10%) | 102 (91.07%) | 3.70 [1.48;9.27] |  |
| Yes | 62 (6.31%) | 57 (6.54%) | 5 (4.46%) | 2.19 [0.61;7.88] |  |
| **Hypertension (N=983)** |  |  |  |  |  |
| No | 478 (48.63%) | 414 (47.53%) | 64 (57.14%) | 1.00 | 0.06 |
| Yes | 505 (51.37%) | 457 (52.47%) | 48 (42.86%) | 0.68 [0.46;1.01] |  |
| **Ischemic cardiopathy (N=983)** |  |  |  |  |  |
| No | 897 (91.25%) | 792 (90.93%) | 105 (93.75%) | 1.00 | 0.32 |
| Yes | 86 (8.75%) | 79 (9.07%) | 7 (6.25%) | 0.67 [0.30;1.49] |  |
| **Chronic heart failure (N=983)** |  |  |  |  |  |
| No | 966 (98.27%) | 857 (98.39%) | 109 (97.32%) | 1.00 | 0.43 |
| Yes | 17 (1.73%) | 14 (1.61%) | 3 (2.68%) | 1.68 [0.48;5.96] |  |
| **Diabetes mellitus (N=983)** |  |  |  |  |  |
| No | 689 (70.09%) | 605 (69.46%) | 84 (75.00%) | 1.00 | 0.23 |
| Yes | 294 (29.91%) | 266 (30.54%) | 28 (25.00%) | 0.76 [0.48;1.19] |  |
| **Immunosuppressive treatment (N=983)** |  |  |  |  |  |
| No | 924 (94.00%) | 816 (93.69%) | 108 (96.43%) | 1.00 | 0.25 |
| Yes | 59 (6.00%) | 55 (6.31%) | 4 (3.57%) | 0.55 [0.20;1.55] |  |
| **Infection immunodepression (N=983)** |  |  |  |  |  |
| No | 970 (98.68%) | 860 (98.74%) | 110 (98.21%) | 1.00 | 0.65 |
| Yes | 13 (1.32%) | 11 (1.26%) | 2 (1.79%) | 1.42 [0.31;6.50] |  |
| **Gastric or duodenal peptic ucler (N=983)** |  |  |  |  |  |
| No | 968 (98.47%) | 856 (98.28%) | 112 (100.00%) | 1.00 | 0.40 |
| Yes | 15 (1.53%) | 15 (1.72%) | 0 (0.00%) | - |  |
| **COPD/SAS/Asthma (N=983)** |  |  |  |  |  |
| No | 809 (82.30%) | 717 (82.32%) | 92 (82.14%) | 1.00 | 0.96 |
| Yes | 174 (17.70%) | 154 (17.68%) | 20 (17.86%) | 1.01 [0.61;1.69] |  |
| **Long-term oxygen therapy (N=982)** |  |  |  |  |  |
| No | 978 (99.59%) | 867 (99.54%) | 111 (100.00%) | 1.00 | >0.99 |
| Yes | 4 (0.41%) | 4 (0.46%) | 0 (0.00%) | - |  |
| **Chronic renal failure (N=982)** |  |  |  |  |  |
| No | 895 (91.14%) | 787 (90.46%) | 108 (96.43%) | 1.00 | 0.0364 |
| Yes | 87 (8.86%) | 83 (9.54%) | 4 (3.57%) | 0.35 [0.13;0.98] |  |
| **Chronic dialysis (N=983)** |  |  |  |  |  |
| No | 951 (96.74%) | 841 (96.56%) | 110 (98.21%) | 1.00 | 0.57 |
| Yes | 32 (3.26%) | 30 (3.44%) | 2 (1.79%) | 0.51 [0.12;2.16] |  |
| **Cancer/malignant hemopathy (N=982)** |  |  |  |  |  |
| No | 881 (89.71%) | 777 (89.21%) | 104 (93.69%) | 1.00 | 0.14 |
| Yes | 101 (10.29%) | 94 (10.79%) | 7 (6.31%) | 0.56 [0.25;1.23] |  |
| **Stroke (N=983)** |  |  |  |  |  |
| No | 934 (95.02%) | 825 (94.72%) | 109 (97.32%) | 1.00 | 0.23 |
| Yes | 49 (4.98%) | 46 (5.28%) | 3 (2.68%) | 0.49 [0.15;1.61] |  |
| **Proton pump inhibitor (N=975)** |  |  |  |  |  |
| No | 796 (81.64%) | 702 (81.34%) | 94 (83.93%) | 1.00 | 0.51 |
| Yes | 179 (18.36%) | 161 (18.66%) | 18 (16.07%) | 0.83 [0.49;1.42] |  |
| **Anticoagulation (N=971)** |  |  |  |  |  |
| No | 885 (91.14%) | 779 (90.58%) | 106 (95.50%) | 1.00 | 0.09 |
| Yes | 86 (8.86%) | 81 (9.42%) | 5 (4.50%) | 0.45 [0.18;1.14] |  |
| **Antiaggregant therapy (N=972)** |  |  |  |  |  |
| No | 793 (81.58%) | 701 (81.42%) | 92 (82.88%) | 1.00 | 0.71 |
| Yes | 179 (18.42%) | 160 (18.58%) | 19 (17.12%) | 0.90 [0.54;1.53] |  |

Supplementary table 3: Evolution during hospital stay: Total population Tocilizumab vs no Tocilizumab

|  | Total (N=2587) | No Tocilizumab (N=2395) | Tocilizumab (N=192) | OR [IC95%] | p |
| --- | --- | --- | --- | --- | --- |
| **New anticoagulation (N=2572)** |  |  |  |  |  |
| No | 305 (11.86%) | 304 (12.77%) | 1 (0.52%) | 1.00 | <0.0001 |
| Yes | 2267 (88.14%) | 2076 (87.23%) | 191 (99.48%) | 27.97 [3.91;200.31] |  |
| **Anticoagulation, type (N=2267)** |  |  |  |  |  |
| Curative | 629 (27.75%) | 580 (27.94%) | 49 (25.65%) | 1.00 | <0.0001 |
| Preventive | 774 (34.14%) | 756 (36.42%) | 18 (9.42%) | 0.28 [0.16;0.49] |  |
| Intermediate dose preventive | 864 (38.11%) | 740 (35.65%) | 124 (64.92%) | 1.98 [1.40;2.81] |  |
| **Corticosteroids** |  |  |  |  |  |
| No | 1110 (42.91%) | 1105 (46.14%) | 5 (2.60%) | 1.00 | <0.0001 |
| Yes | 1477 (57.09%) | 1290 (53.86%) | 187 (97.40%) | 32.04 [13.13;78.15] |  |
| **Proton pump inhibitors (N=2586)** |  |  |  |  |  |
| No | 2337 (90.37%) | 2217 (92.61%) | 120 (62.50%) | 1.00 | <0.0001 |
| Yes | 249 (9.63%) | 177 (7.39%) | 72 (37.50%) | 7.52 [5.40;10.45] |  |
| **Chloroquine / Hydroxychloroquine (N=2585)** |  |  |  |  |  |
| No | 2468 (95.47%) | 2276 (95.11%) | 192 (100.00%) | 1.00 | 0.0017 |
| Yes | 117 (4.53%) | 117 (4.89%) | 0 (0.00%) | - |  |
| **Anakinra (N=2583)** |  |  |  |  |  |
| No | 2507 (97.06%) | 2315 (96.82%) | 192 (100.00%) | 1.00 | 0.0122 |
| Yes | 76 (2.94%) | 76 (3.18%) | 0 (0.00%) | - |  |
| **Lopinavir/ritonavir (N=2580)** |  |  |  |  |  |
| No | 2561 (99.26%) | 2370 (99.25%) | 191 (99.48%) | 1.00 | >0.99 |
| Yes | 19 (0.74%) | 18 (0.75%) | 1 (0.52%) | 0.69 [0.09;5.19] |  |
| **Sarilumab (N=2576)** |  |  |  |  |  |
| No | 2544 (98.76%) | 2363 (98.66%) | 181 (100.00%) | 1.00 | 0.17 |
| Yes | 32 (1.24%) | 32 (1.34%) | 0 (0.00%) | - |  |
| **Standard supplemental oxygen (days) (N=2559)** |  |  |  |  |  |
| Median [Q1;Q3] | 3.00 [1.00;6.00] | 3.00 [1.00;6.00] | 4.00 [1.00;7.00] |  | 0.0031 |
| **High flow nasal oxygen (HFNO) (N=2574)** |  |  |  |  |  |
| No | 2293 (89.08%) | 2154 (90.35%) | 139 (73.16%) | 1.00 | <0.0001 |
| Yes | 281 (10.92%) | 230 (9.65%) | 51 (26.84%) | 3.44 [2.43;4.87] |  |
| **If HFNO, length(days) (N=278)** |  |  |  |  |  |
| Median [Q1;Q3] | 2.00 [1.00;6.00] | 2.00 [1.00;5.00] | 3.00 [1.00;7.00] |  | 0.31 |
| **Length of ward stay (jours) (N=2585)** |  |  |  |  |  |
| Median [Q1;Q3] | 7.00 [4.00;12.00] | 7.00 [4.00;11.00] | 9.00 [6.00;15.50] |  | <0.0001 |
| **Length of stay before ICU admission (days)(N=2342)** |  |  |  |  |  |
| Median [Q1;Q3] | 4.00 [2.00;8.00] | 4.00 [2.00;8.00] | 4.00 [2.00;9.00] |  | 0.49 |
| **Length of ICU stay (days) (N=2585)** |  |  |  |  |  |
| Median [Q1;Q3] | 0.00 [0.00;5.00] | 0.00 [0.00;5.00] | 3.00 [0.00;9.00] |  | <0.0001 |
| **Length of hospital stay (days)** |  |  |  |  |  |
| Median [Q1;Q3] | 10.00 [6.00;18.00] | 10.00 [6.00;17.00] | 15.00 [10.00;24.00] |  | <0.0001 |

Supplementary table 4: Evolution during hospital stay: patient only requiring ward hospitalization (“ward group”) : Tocilizumab vs no Tocilizumab

|  | Total (N=1603) | No Tocilizumab (N=1523) | Tocilizumab (N=80) | OR [IC95%] | p |
| --- | --- | --- | --- | --- | --- |
| **New anticoagulation (N=1596)** |  |  |  |  |  |
| No | 135 (8.46%) | 135 (8.91%) | 0 (0.00%) | 1.00 | 0.0053 |
| Yes | 1461 (91.54%) | 1381 (91.09%) | 80 (100.00%) | - |  |
| **Anticoagulation, type (N=1461)** |  |  |  |  |  |
| Curative | 367 (25.12%) | 347 (25.13%) | 20 (25.00%) | 1.00 | <0.0001 |
| Preventive | 652 (44.63%) | 643 (46.56%) | 9 (11.25%) | 0.24 [0.11;0.54] |  |
| Intermediate dose preventive | 442 (30.25%) | 391 (28.31%) | 51 (63.75%) | 2.26 [1.32;3.87] |  |
| **Corticosteroids** |  |  |  |  |  |
| No | 746 (46.54%) | 744 (48.85%) | 2 (2.50%) | 1.00 | <0.0001 |
| Yes | 857 (53.46%) | 779 (51.15%) | 78 (97.50%) | 37.25 [9.12;152.13] |  |
| **Proton pump inhibitors** |  |  |  |  |  |
| No | 1477 (92.14%) | 1425 (93.57%) | 52 (65.00%) | 1.00 | <0.0001 |
| Yes | 126 (7.86%) | 98 (6.43%) | 28 (35.00%) | 7.83 [4.73;12.95] |  |
| **Chloroquine/ Hydroxychloroquine (N=1601)** |  |  |  |  |  |
| No | 1525 (95.25%) | 1445 (95.00%) | 80 (100.00%) | 1.00 | 0.0298 |
| Yes | 76 (4.75%) | 76 (5.00%) | 0 (0.00%) | - |  |
| **Anakinra (N=1599)** |  |  |  |  |  |
| No | 1541 (96.37%) | 1461 (96.18%) | 80 (100.00%) | 1.00 | 0.11 |
| Yes | 58 (3.63%) | 58 (3.82%) | 0 (0.00%) | - |  |
| **Lopinavir/ritonavir (N=1597)** |  |  |  |  |  |
| No | 1593 (99.75%) | 1513 (99.74%) | 80 (100.00%) | 1.00 | >0.99 |
| Yes | 4 (0.25%) | 4 (0.26%) | 0 (0.00%) | - |  |
| **Sarilumab (N=1601)** |  |  |  |  |  |
| No | 1590 (99.31%) | 1512 (99.28%) | 78 (100.00%) | 1.00 | >0.99 |
| Yes | 11 (0.69%) | 11 (0.72%) | 0 (0.00%) | - |  |
| **Standard supplemental oxygen (days) (N=1584)** |  |  |  |  |  |
| Median [Q1;Q3] | 4.00 [2.00;8.00] | 4.00 [2.00;7.00] | 8.00 [5.00;12.00] |  | <0.0001 |
| **High flow nasal oxygen (HFNO) (N=1595)** |  |  |  |  |  |
| No | 1473 (92.35%) | 1415 (93.34%) | 58 (73.42%) | 1.00 | <0.0001 |
| Yes | 122 (7.65%) | 101 (6.66%) | 21 (26.58%) | 5.07 [2.96;8.69] |  |
| **If HFNO, length(days) (N=120)** |  |  |  |  |  |
| Median [Q1;Q3] | 5.00 [3.00;8.00] | 5.00 [2.00;7.00] | 7.00 [4.00;10.00] |  | 0.0037 |
| **Length of hospital stay (days) (N=1601)** |  |  |  |  |  |
| Median [Q1;Q3] | 7.00 [4.00;11.00] | 7.00 [4.00;11.00] | 10.00 [7.00;17.00] |  | <0.0001 |

Supplementary table 5: Evolution during hospital stay: patient only requiring ICU admission (“ICU group”) : Tocilizumab vs no Tocilizumab

|  | Total (N=984) | No Tocilizumab (N=872) | Tocilizumab (N=112) | OR [IC95%] | p |
| --- | --- | --- | --- | --- | --- |
| **Anticoagulation (N=976)** |  |  |  |  |  |
| No | 170 (17.42%) | 169 (19.56%) | 1 (0.89%) | 1.00 | <0.0001 |
| Yes | 806 (82.58%) | 695 (80.44%) | 111 (99.11%) | 26.99 [3.74;194.70] |  |
| **Anticoagulation, type (N=806)** |  |  |  |  |  |
| Curative | 262 (32.51%) | 233 (33.53%) | 29 (26.13%) | 1.00 | 0.0060 |
| Preventive | 122 (15.14%) | 113 (16.26%) | 9 (8.11%) | 0.64 [0.29;1.40] |  |
| Intermediate dose preventive | 422 (52.36%) | 349 (50.22%) | 73 (65.77%) | 1.68 [1.06;2.66] |  |
| **Corticosteroids** |  |  |  |  |  |
| No | 364 (36.99%) | 361 (41.40%) | 3 (2.68%) | 1.00 | <0.0001 |
| Yes | 620 (63.01%) | 511 (58.60%) | 109 (97.32%) | 25.67 [8.09;81.47] |  |
| **Proton pump inhibitors (N=983)** |  |  |  |  |  |
| No | 860 (87.49%) | 792 (90.93%) | 68 (60.71%) | 1.00 | <0.0001 |
| Yes | 123 (12.51%) | 79 (9.07%) | 44 (39.29%) | 6.49 [4.16;10.11] |  |
| **Chloroquine / hydroxychloroquine** |  |  |  |  |  |
| No | 943 (95.83%) | 831 (95.30%) | 112 (100.00%) | 1.00 | 0.0105 |
| Yes | 41 (4.17%) | 41 (4.70%) | 0 (0.00%) | - |  |
| **Anakinra** |  |  |  |  |  |
| No | 966 (98.17%) | 854 (97.94%) | 112 (100.00%) | 1.00 | 0.25 |
| Yes | 18 (1.83%) | 18 (2.06%) | 0 (0.00%) | - |  |
| **Lopinavir/ritonavir (N=983)** |  |  |  |  |  |
| No | 968 (98.47%) | 857 (98.39%) | 111 (99.11%) | 1.00 | >0.99 |
| Yes | 15 (1.53%) | 14 (1.61%) | 1 (0.89%) | 0.55 [0.07;4.23] |  |
| **Sarilumab (N=975)** |  |  |  |  |  |
| No | 954 (97.85%) | 851 (97.59%) | 103 (100.00%) | 1.00 | 0.15 |
| Yes | 21 (2.15%) | 21 (2.41%) | 0 (0.00%) | - |  |
| **Standard supplemental oxygen (days) (N=975)** |  |  |  |  |  |
| Median [Q1;Q3] | 1.00 [1.00;3.00] | 1.00 [1.00;3.00] | 1.50 [1.00;3.00] |  | 0.0163 |
| **High flow nasal oxygen (HFNO) (N=979)** |  |  |  |  |  |
| No | 820 (83.76%) | 739 (85.14%) | 81 (72.97%) | 1.00 | 0.0011 |
| Yes | 159 (16.24%) | 129 (14.86%) | 30 (27.03%) | 2.12 [1.34;3.36] |  |
| **If HFNO, length(days) (N=158)** |  |  |  |  |  |
| Median [Q1;Q3] | 1.00 [1.00;3.00] | 1.25 [1.00;3.00] | 1.00 [1.00;3.00] |  | 0.37 |
| **Total length of ward stay (days)** |  |  |  |  |  |
| Median [Q1;Q3] | 7.00 [2.00;13.00] | 6.00 [2.00;13.00] | 9.00 [4.00;14.00] |  | 0.0124 |
| **Length of ward stay before ICU admission (days) (N=980)** |  |  |  |  |  |
| Median [Q1;Q3] | 1.00 [1.00;4.00] | 1.00 [1.00;4.00] | 2.00 [1.00;4.00] |  | 0.0177 |
| **Length of ICU stay (days)** |  |  |  |  |  |
| Median [Q1;Q3] | 9.00 [4.00;20.25] | 9.00 [4.00;21.00] | 8.00 [4.00;20.00] |  | 0.56 |
| **Length of hospital stay (days)** |  |  |  |  |  |
| Median [Q1;Q3] | 19.00 [11.00;33.00] | 18.00 [11.00;33.00] | 19.50 [13.00;31.50] |  | 0.39 |

Supplementary table 6: Evolution during ICU stay (“ICU group”): Tocilizumab vs no Tocilizumab

|  | Total (N=984) | No Tocilizumab (N=872) | Tocilizumab (N=112) | OR [IC95%] | p |
| --- | --- | --- | --- | --- | --- |
| **SAPS II (N=961)** |  |  |  |  |  |
| Mean (SD) | 40.51 (18.32) | 41.47 (18.74) | 33.29 (12.66) |  | <0.0001 |
| **HFNO/NIV (N=978)** |  |  |  |  |  |
| No | 312 (31.90%) | 296 (34.18%) | 16 (14.29%) | 1.00 | <0.0001 |
| Yes | 666 (68.10%) | 570 (65.82%) | 96 (85.71%) | 3.12 [1.80;5.39] |  |
| **If HFNO or NIV, length (days) (N=666)** |  |  |  |  |  |
| Median [Q1;Q3] | 3.00 [1.00;5.00] | 3.00 [1.00;5.00] | 3.00 [2.00;5.25] |  | 0.13 |
| **Invasive mechanical ventilation (N=983)** |  |  |  |  |  |
| No | 418 (42.52%) | 357 (40.99%) | 61 (54.46%) | 1.00 | 0.0066 |
| Yes | 565 (57.48%) | 514 (59.01%) | 51 (45.54%) | 0.58 [0.39;0.86] |  |
| **If invasive mechanical ventilation, length (days) (N=563)** |  |  |  |  |  |
| Median [Q1;Q3] | 14.00 [7.50;29.00] | 14.00 [7.00;29.00] | 17.00 [8.00;30.00] |  | 0.50 |
| **Prone position (N=982)** |  |  |  |  |  |
| No | 566 (57.64%) | 496 (57.01%) | 70 (62.50%) | 1.00 | 0.27 |
| Yes | 416 (42.36%) | 374 (42.99%) | 42 (37.50%) | 0.80 [0.53;1.19] |  |
| **Muscular blockers (N=983)** |  |  |  |  |  |
| No | 471 (47.91%) | 406 (46.61%) | 65 (58.04%) | 1.00 | 0.0227 |
| Yes | 512 (52.09%) | 465 (53.39%) | 47 (41.96%) | 0.63 [0.42;0.94] |  |
| **VV or VA ECMO (N=982)** |  |  |  |  |  |
| No | 918 (93.48%) | 815 (93.68%) | 103 (91.96%) | 1.00 | 0.49 |
| Yes | 64 (6.52%) | 55 (6.32%) | 9 (8.04%) | 1.29 [0.62;2.70] |  |
| **Cardiac arrest (N=972)** |  |  |  |  |  |
| No | 900 (92.59%) | 796 (92.45%) | 104 (93.69%) | 1.00 | 0.64 |
| Yes | 72 (7.41%) | 65 (7.55%) | 7 (6.31%) | 0.82 [0.37;1.85] |  |
| **Catecholamines (N=980)** |  |  |  |  |  |
| No | 581 (59.29%) | 506 (58.29%) | 75 (66.96%) | 1.00 | 0.08 |
| Yes | 399 (40.71%) | 362 (41.71%) | 37 (33.04%) | 0.69 [0.45;1.05] |  |
| **Dialysis (N=978)** |  |  |  |  |  |
| No | 813 (83.13%) | 714 (82.35%) | 99 (89.19%) | 1.00 | 0.07 |
| Yes | 165 (16.87%) | 153 (17.65%) | 12 (10.81%) | 0.57 [0.30;1.06] |  |
| **Invasive mechanical ventilation and dialysis** |  |  |  |  |  |
| No |  |  |  |  |  |
| Yes |  |  |  |  |  |
| **Invasive mechanical ventilation and catecholamines** |  |  |  |  |  |
| No |  |  |  |  |  |
| Yes |  |  |  |  |  |
| **Invasive mechanical ventilation and dialysis and catecholamines** |  |  |  |  |  |
| No |  |  |  |  |  |
| Yes |  |  |  |  |  |

ECMO: extracorporeal membrane oxygenation (VA: venoarterial; VV: venovenous); HFNO: High flow nasal oxygen; NIV: Noninvasive mechanical ventilation;SAPS II: Simplified acute physiology score II

Supplementary table 7 survival: Tocilizumab vs no Tocilizumab

|  | Total (N=2587) | No Tocilizumab (N=2395) | Tocilizumab (N=192) | OR [IC95%] | p |
| --- | --- | --- | --- | --- | --- |
| **Total population survival** | 2144 (82.88%) | 1994 (83.26%) | 150 (78.12%) | 1.00 | 0.07 |
| **Ward group** |  |  |  |  |  |
| Hospital mortality | 176 (10.98%) | 159 (10.44%) | 17 (21.25%) | 2.31 [1.32;4.05] | 0.0026 |
| Day 90 mortality | 2 (1.14%) | 2 (1.26%) | 0 (0.00%) |  |  |
| **ICU group** |  |  |  |  |  |
| D 28 mortality | 8 (3.00%) | 8 (3.31%) | 0 (0.00%) | 1.00 | >0.99 |
| ICU mortality | 248 (92.88%) | 223 (92.15%) | 25 (100.00%) |  |  |
| Hospital mortality | 267 (27.13%) | 242 (27.75%) | 25 (22.32%) | 0.75 [0.47;1.20] | 0.22 |
| Day 90 mortality | 4 (1.50%) | 4 (1.65%) | 0 (0.00%) |  |  |

Supplementary table 8: infectious complications in the “ward group”: Tocilizumab versus absence of Tocilizumab

|  | Total (N=1603) | No Tocilizumab (N=1523) | Tocilizumab (N=80) | OR [IC95%] | p |
| --- | --- | --- | --- | --- | --- |
| **Infection during hospital stay** | 97 (6.05%) | 88 (5.78%) | 9 (11.25%) | 2.07 [1.00;4.27] | 0.05 |
| **Fungal infection** | 2 (0.12%) | 2 (0.13%) | 0 (0.00%) | - | >0.99 |
| **Viral infection** | 1 (0.06%) | 0 (0.00%) | 1 (1.25%) |  | 0.0499 |
| **Number of infectious episode (N=95)** Mean (SD) | 1.05 (0.27) | 1.07 (0.26) | 0.89 (0.33) |  | 0.06 |
| **Urinary tract infection (N=1602)** | 53 (3.31%) | 50 (3.29%) | 3 (3.75%) | 1.15 [0.35;3.76] | 0.75 |
| **Primitive bacteremia (N=1600)** | 5 (0.31%) | 5 (0.33%) | 0 (0.00%) |  | >0.99 |
| **Secondary bacteremia (N=1600)** | 10 (0.62%) | 9 (0.59%) | 1 (1.25%) | 2.13 [0.27;16.98] | 0.40 |
| **Catheter related infection (N=1599)** | 1 (0.06%) | 1 (0.07%) | 0 (0.00%) |  | >0.99 |
| **Pneumonia** | 6 (0.37%) | 6 (0.39%) | 0 (0.00%) |  | >0.99 |

Supplementary table 9: infectious complications in the “ICU group”: Tocilizumab versus absence of Tocilizumab

|  | Total (N=984) | No Tocilizumab (N=872) | Tocilizumab (N=112) | OR [IC95%] | p |
| --- | --- | --- | --- | --- | --- |
| **Infection during hospital stay** | 429 (43.60%) | 382 (43.81%) | 47 (41.96%) | 0.93 [0.62;1.38] | 0.71 |
| **Fungal infection** | 32 (3.25%) | 27 (3.10%) | 5 (4.46%) | 1.46 [0.55;3.88] | 0.40 |
| **Viral infection** | 30 (3.05%) | 26 (2.98%) | 4 (3.57%) | 1.21 [0.41;3.52] | 0.77 |
| **Number of infectious episode (N=95)** Median [Q1;Q3] | 2.00 [1.00;3.00] | 2.00 [1.00;3.00] | 2.00 [1.00;2.50] |  | 0.88 |
|  |  |  |  |  |  |
| **Urinary tract infection (N=977)** | 42 (4.30%) | 38 (4.39%) | 4 (3.57%) | 0.81 [0.28;2.30] | >0.99 |
| **Primitive bacteremia (N=978)** | 75 (7.67%) | 69 (7.97%) | 6 (5.36%) | 0.65 [0.28;1.54] | 0.33 |
| **Secondary bacteremia (N=977)** | 50 (5.12%) | 46 (5.31%) | 4 (3.60%) | 0.67 [0.24;1.89] | 0.44 |
| **Catheter-related infection (N=976)** | 30 (3.07%) | 30 (3.47%) | 0 (0.00%) |  | **0.0401** |
| **Ventilator-associated pneumonia** | 356 (36.18%) | 314 (36.01%) | 42 (37.50%) | 1.07 [0.71;1.60] | 0.76 |

Supplementary table 10: non-infectious complication: Tocilizumab versus absence of Tocilizumab

|  | Total (N=2587) | No Tocilizumab (N=2395) | Tocilizumab (N=192) | OR [IC95%] | p |
| --- | --- | --- | --- | --- | --- |
| **Global population** |  |  |  |  |  |
| **Any adverse event** |  |  |  |  |  |
| **Number of non-infectious adverse event** (Median [Q1;Q3]) |  |  |  |  |  |
| **Hematological complication** | 63 (2.44%) | 55 (2.30%) | 8 (4.17%) | 1.85 [0.87;3.94] | 0.14 |
| - Thrombopenia (N=62) | 58 (93.55%) | 50 (92.59%) | 8 (100.00%) |  | >0.99 |
| - Length of thrombopenia (days) (N=57) Median [Q1;Q3] | 4.00 [2.00;7.00] | 4.00 [2.00;6.00] | 4.00 [1.75;10.00] |  | 0.94 |
| - Neutropenia(N=63) | 8 (12.70%) | 8 (14.55%) | 0 (0.00%) | 1.00 | 0.58 |
| - Severe neutropenia (N=62) | 3 (4.84%) | 3 (5.56%) | 0 (0.00%) | 1.00 | >0.99 |
| **Bleeding (N=2586)** | 76 (2.94%) | 73 (3.05%) | 3 (1.57%) | 0.51 [0.16;1.63] | 0.24 |
| - Number of bleeding episodes (N=)Mean (SD) | 1.22 (0.56) | 1.21 (0.53) | 1.67 (1.15) |  | 0.36 |
| - Gastroduodenal bleeding (N=76) | 21 (27.63%) | 21 (28.77%) | 0 (0.00%) | 1.00 | 0.56 |
| - Lower digestive tract bleeding (N=76) | 7 (9.21%) | 7 (9.59%) | 0 (0.00%) | 1.00 | >0.99 |
| **Digestive perforation (N=76)** | 2 (2.63%) | 1 (1.37%) | 1 (33.33%) | 36.00 [1.61;805.20] | 0.08 |
| **Ward group** |  |  |  |  |  |
| **Any adverse event** |  |  |  |  |  |
| **Number of non-infectious adverse event (Median [Q1;Q3])** |  |  |  |  |  |
| **Hematological complication** | 33 (2.06%) | 29 (1.90%) | 4 (5.00%) | 2.71 [0.93;7.91] | 0.08 |
| - Thrombopenia (N=32) | 30 (93.75%) | 26 (92.86%) | 4 (100.00%) | 1.00 | >0.99 |
| - Length of thrombopenia (days) (N=30) Median [Q1;Q3] | 2.00 [1.00;4.75] | 2.50 [1.00;5.75] | 1.50 [1.00;2.00] |  | 0.20 |
| - Neutropenia(N=33) | 5 (15.15%) | 5 (17.24%) | 0 (0.00%) | 1.00 | >0.99 |
| - Severe neutropenia (N=33) | 1 (3.03%) | 1 (3.45%) | 0 (0.00%) | 1.00 | >0.99 |
| **Bleeding (N=1603)** | 12 (0.75%) | 11 (0.72%) | 1 (1.25%) | 1.74 [0.22;13.65] | 0.46 |
| - Gastroduodenal bleeding (N=76) | 1 (8.33%) | 1 (9.09%) | 0 (0.00%) | 1.00 | >0.99 |
| - Lower digestive tract bleeding (N=76) | 1 (8.33%) | 1 (9.09%) | 0 (0.00%) | 1.00 | >0.99 |
| **Digestive perforation (N=76)** | 1 (8.33%) | 0 (0.00%) | 1 (100.00%) | 1.00 | 0.08 |
| **ICU group** |  |  |  |  |  |
| **Any adverse event** |  |  |  |  |  |
| **Number of non-infectious adverse event (Median [Q1;Q3])** |  |  |  |  |  |
| **Hematological complication** | 30 (3.05%) | 26 (2.98%) | 4 (3.57%) | 1.21 [0.41;3.52] | 0.77 |
| - Thrombopenia (N=30) | 28 (93.33%) | 24 (92.31%) | 4 (100.00%) | 1.00 | >0.99 |
| - Length of thrombopenia (days) (N=27) Median [Q1;Q3] | 5.00 [3.00;10.50] | 5.00 [2.50;10.50] | 10.00 [9.00;11.00] |  | 0.18 |
| - Neutropenia(N=30) | 3 (10.00%) | 3 (11.54%) | 0 (0.00%) | 1.00 | >0.99 |
| - Severe neutropenia (N=29) | 2 (6.90%) | 2 (8.00%) | 0 (0.00%) | 1.00 | >0.99 |
| **Bleeding (N=983)** | 64 (6.51%) | 62 (7.11%) | 2 (1.80%) | 0.24 [0.06;0.99] | 0.0328 |
| - Gastroduodenal bleeding (N=64) | 20 (31.25%) | 20 (32.26%) | 0 (0.00%) | 7 (10.94%) | 7 (11.29%) |
| - Lower digestive tract bleeding (N=64) | 7 (10.94%) | 7 (11.29%) | 0 (0.00%) | 1.00 | >0.99 |
| **Digestive perforation (N=64)** | 1 (1.56%) | 1 (1.61%) | 0 (0.00%) | 1.00 | >0.99 |

Supplementary table 11: Infectious complications function of comorbidities

|  | **Total population**  **(N=2733)** | **Comorbidity 0 or 1 (n = 1603)** | **Comorbidities 2 or more**  **(n = 1130)** | **OR [IC95%]** | **p** |
| --- | --- | --- | --- | --- | --- |
| **Number of comorbidities** |  |  |  |  |  |
| 0 | 827 (30.3%) | 827 (51.6%) | 0 (0.0%) |  |  |
| 1 | 776 (28.4%) | 776 (48.4%) | 0 (0.0%) |  |  |
| 2 | 599 (21.9%) | 0 (0.0%) | 599 (53.0%) |  |  |
| 3 | 314 (11.5%) | 0 (0.0%) | 314 (27.8%) |  |  |
| 4 | 158 (5.8%) | 0 (0.0%) | 158 (13.9%) |  |  |
| 5 | 41 (1.5%) | 0 (0.0%) | 41 (3.6%) |  |  |
| 6 | 14 (0.5%) | 0 (0.0%) | 14 (1.2%) |  |  |
| 7 | 4 (0.1%) | 0 (0.0%) | 4 (0.4%) |  |  |
| **Type of IL-6R inhibitor** |  |  |  |  |  |
| Sarilumab | 2356 (91.39%) | 1374 (90.81%) | 982 (92.21%) | 1 | 0,21 |
| Tocilizumab | 222 (8.61%) | 139 (9.19%) | 83 (7.79%) | 0.84 [0.63;1.11] |  |
| **Infection during hospital stay** | 562 (20.62%) | 311 (19.41%) | 251 (22.33%) | 1.19 [0.99;1.44] | 0,06 |
| **Fungal infection** | 35 (1.28%) | 20 (1.25%) | 15 (1.33%) | 1.07 [0.55;2.10] | 0,84 |
| **Viral infection** | 32 (1.17%) | 21 (1.31%) | 11 (0.98%) | 0.74 [0.36;1.55] | 0,43 |
| **Urinary tract infection** | 97 (3.99%) | 51 (3.57%) | 46 (4.60%) | 1.31 [0.87;1.96] | 0,2 |
| **Primitive bacteremia** | 81 (2.98%) | 51 (3.20%) | 30 (2.68%) | 0.83 [0.53;1.32] | 0.43 |
| **Secondary bacteremia** | 63 (2.32%) | 31 (1.95%) | 32 (2.85%) | 1.48 [0.90;2.44] | 0.12 |
| **Catheter related infection** | 32 (1.32%) | 15 (1.05%) | 17 (1.70%) | 1.63 [0.81;3.28] | 0.17 |
| **Pneumonia** | 395 (14.49%) | 230 (14.36%) | 165 (14.68%) | 1.03 [0.83;1.27] | 0.81 |

Supplementary table 12: Infectious complications function of organ failures

|  | **Total population**  **(N=984)** | **Comorbidity 0 or 1 (n = 589)** | **Comorbidities 2 or more**  **(n = 395)** | **OR [IC95%]** | **p** |
| --- | --- | --- | --- | --- | --- |
| **Number of organ failures** |  |  |  |  |  |
| 0 | 403 (39.1%) | 403 (68.4%) | 0 (0.0) |  |  |
| 1 | 186 (18.1%) | 186 (31.6%) | 0 (0.0) |  |  |
| 2 | 295 (28.6%) | 0 (0.0) | 264 (66.9) |  |  |
| 3 | 146 (14.2%) | 0 (0.0) | 130 (33.1) |  |  |
| **Type of IL-6R inhibitor** |  |  |  |  |  |
| Sarilumab | 844 (86.56%) | 488 (86.07%) | 356 (87.25%) | 1 | 0,59 |
| Tocilizumab | 131 (13.44%) | 79 (13.93%) | 52 (12.75%) | 0.90 [0.62;1.31] |  |
| **Infection during hospital stay** | 458 (44.47%) | 117 (19.86%) | 341 (77.32%) | 13.76 [10.18;18.59] | <0.0001 |
| **Fungal infection** | 33 (3.20%) | 5 (0.85%) | 28 (6.35%) | 7.92 [3.03;20.68] | <0.0001 |
| **Viral infection** | 30 (2.91%) | 4 (0.68%) | 26 (5.90%) | 9.16 [3.17;26.45] | <0.0001 |
| **Number of VAP episodes** | 0.00 [0.00;1.00] | 0.00 [0.00;0.00] | 1.00 [1.00;2.00] |  | <0.0001 |
| **Urinary tract infection** | 42 (4.11%) | 16 (2.74%) | 26 (5.96%) | 2.26 [1.19;4.26] | 0.0102 |
| **Primitive bacteremia** | 72 (7.05%) | 15 (2.56%) | 57 (13.07%) | 5.73 [3.19;10.26] | <0.0001 |
| **Secondary bacteremia** | 53 (5.19%) | 8 (1.37%) | 45 (10.32%) | 8.32 [3.88;17.83] | <0.0001 |
| **Catheter related infection** | 30 (2.94%) | 4 (0.68%) | 26 (5.96%) | 9.21 [3.19;26.59] | <0.0001 |
| **Pneumonia** | 385 (37.38%) | 82 (13.92%) | 303 (68.71%) | 13.58 [9.98;18.47] | <0.0001 |

Supplementary table 13: Infectious complications function of time of ICU admission

|  | **Total population**  **(N=1030)** | **Comorbidity 0 or 1 (n = 589)** | **Comorbidities 2 or more**  **(n = 441)** | **OR [IC95%]** | **p** |
| --- | --- | --- | --- | --- | --- |
| **IL-6R inhibitor**  (Sarilumab or Tocilizumab) | 133 (13.57%) | 124 (15.14%) | 9 (5.59%) | 0.33 [0.16;0.67] | **0.0012** |
| **Infection during hospital stay** | 465 (44.88%) | 356 (42.18%) | 109 (56.77%) | 1.80 [1.31;2.47] | **0.0002** |
| **Fungal infection** | 33 (3.19%) | 24 (2.84%) | 9 (4.69%) | 1.68 [0.77;3.68] | 0.19 |
| **Viral infection** | 31 (2.99%) | 26 (3.08%) | 5 (2.60%) | 0.84 [0.32;2.22] | 0.73 |
| **Number of VAP episodes** | 0.00 [0.00;1.00] | 0.00 [0.00;1.00] | 1.00 [0.00;2.00] |  | **0,0003** |
| **Urinary tract infection** | 42 (4.09%) | 38 (4.54%) | 4 (2.12%) | 0.45 [0.16;1.29] | 0.13 |
| **Primitive bacteremia** | 76 (7.39%) | 57 (6.79%) | 19 (10.05%) | 1.53 [0.89;2.64] | 0.12 |
| **Secondary bacteremia** | 53 (5.16%) | 41 (4.89%) | 12 (6.35%) | 1.32 [0.68;2.56] | 0.41 |
| **Catheter related infection** | 31 (3.02%) | 22 (2.63%) | 9 (4.76%) | 1.85 [0.84;4.09] | 0.12 |
| **Pneumonia** | 390 (37.64%) | 294 (34.83%) | 96 (50.00%) | 1.87 [1.36;2.57] | **<0.0001** |

Supplementary table 14: Infectious complications: multiples imputations
